# Supplementary material
Source: PubMed Central journal article supplement (PMC2234146)
Supplement: pnas_0710986105_1.pdf [file pnas_0710986105_1.pdf]

## Appendix A

### Determination of $k_{TM}$

When  $w_0 > w_N$ , the fiber matrix in the TM is in tension, and  $k_{TM}$  is assumed to be constant and equal to  $k_{TM,N}$ , the elastic constant at  $w = w_N$ .  $k_{TM,N}$  is estimated to be  $7.35 \times 10^{-3}$  cm H<sub>2</sub>O/nm and is determined by requiring that the initial thickness of the TM,  $w_0$ , in its fully hydrated high filtration state be 500 nm when  $P_L = 60$  cm H<sub>2</sub>O.  $P_0$  counterbalances the elastic restoring force and causes the fluid to drain out of region TM into the much larger tissue space through the cleft and region E.

When  $w_0 < w_N$ , the fiber matrix in the TM is in compression, and  $k_{TM}$  follows the non-linear elastic law described by the theoretical predictions and experimental measurements in refs. 1 and 2 for the compression of the thin subendothelial intimal matrix layer beneath rat aortic endothelium due to pressure loading. Fig. 4 in ref. 2 shows the relationship between its dimensionless thickness  $w$  as a function of  $P_L$ . This relationship is well described by a third-order polynomial, from which one obtains the elastic constant  $k_{TM}$  by evaluating  $dP/dw$  as a function of  $w$ . The compression pressure,  $P$ , in the subendothelial arterial intima is  $-P_L$ .

$$P = k_I(w - w_{IN}), \text{ [A1]}$$

where  $w_{IN}$  is the neutral position of the fiber matrix in the subendothelial intimal layer, and  $k_I$  is the elastic constant of the intimal layer under compression.  $k_I$  is a function of  $(w - w_{IN})$ .

$$k_I = \frac{dP}{dw}. \text{ [A2]}$$

One assumes that

$$\bar{P} = \frac{P}{P_{\max}}, \text{ and } \bar{w} = \frac{w - w_{IN}}{w_{IN}},$$

where  $-P_{\max}$  is the maximum  $P_L$  applied in ref. 2, 150 mm Hg. Therefore,

$$k_I = \frac{d\bar{P}}{d\bar{w}}, \text{ [A3]}$$

and

$$\frac{k_I}{k_{IN}} = \left( \frac{d\bar{P}}{d\bar{w}} \right) / \left( \frac{d\bar{P}}{d\bar{w}} \right)_N, \text{ [A4]}$$

where  $k_{IN}$  is the elastic constant at  $w_{IN}$ , and  $\left( \frac{d\bar{P}}{d\bar{w}} \right)_N$  is  $\left( \frac{d\bar{P}}{d\bar{w}} \right)$  evaluated at  $w = w_{IN}$ . The

ratio of  $\frac{k_I}{k_{IN}}$  as a function of  $\bar{w}$  is shown in Fig. A1. One notices that the increase in  $k_I$

with  $\bar{w}$  is non-linear.

Due to the similarity of the subendothelial matrix in the TM beneath the ECs in our microvessels and that in the aortic intimal layer, we assume that the change in the elastic constant of the TM under compression,  $k_{TM}$ , follows the same relation as for the aortic intimal layer, which is shown in Fig. 4 in ref. 2 and described in Eq. A4. Therefore, when

$w < w_N$ ,

$$\frac{k_{TM}}{k_{TM,N}} = \left( \frac{d\bar{P}}{d\bar{w}} \right) / \left( \frac{d\bar{P}}{d\bar{w}} \right)_N, \text{ [A5]}$$

where  $k_{TM,N}$  is the elastic constant when  $w = w_N$ ,  $7.35 \times 10^{-3}$  cm H<sub>2</sub>O/nm, and  $\left(\frac{d\bar{P}}{d\bar{w}}\right)_N$  is

$\left(\frac{d\bar{P}}{d\bar{w}}\right)$  evaluated at  $w = w_N$ .  $\left(\frac{d\bar{P}}{d\bar{w}}\right) / \left(\frac{d\bar{P}}{d\bar{w}}\right)_N$  as a function of  $\bar{w}$  for the TM follows the

curve in Fig. A1. One finds that at the maximum compaction of the TM,  $w = 40$  nm, or

$\bar{w} = 0.6$ ,  $\left(\frac{d\bar{P}}{d\bar{w}}\right) / \left(\frac{d\bar{P}}{d\bar{w}}\right)_N$  is 2.7 and  $k_{TM} = 2.01 \times 10^{-3}$  cm H<sub>2</sub>O/nm.

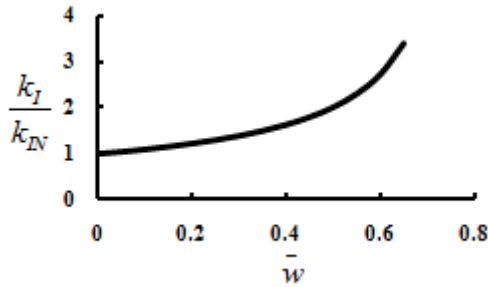

**Fig. A1.** Non-linear function for  $\frac{k_I}{k_{IN}}$  as a function of  $\bar{w}$  derived from Fig. 4 in ref. 2.

1. Huang Y, Jan KM, Rumschitzki D, Weinbaum S (1998) Structural changes in rat aortic intima due to transmural pressure. *J Biomech Eng* 120:476-483.
2. Guyton AC (1963) A concept of negative interstitial pressure based on pressures in implanted perforated capsules. *Circ Res* 12:399-414.
